# Supplementary material
Source: publisher figshare collection journal article supplement (https://geolsoc.figshare.com/ndownloader/files/27798960)
Supplement: Supplementary file 1 [file 27798960]

## Sheet: S2
Supplementary Table 2: Sr-Nd-Pb isotopic ratios and isotope-dilution (ID) abundances for selected samples of central-western Madagascar
Sample	M104	M105	M111	M115	M158	M168	M129	M162	M108	M153	M160	M145	M146	M148
Series	weakly alkaline	weakly alkaline	weakly alkaline	weakly alkaline	weakly alkaline	weakly alkaline	tholeiitic	tholeiitic	tholeiitic	tholeiitic	tholeiitic	tholeiitic	tholeiitic	tholeiitic
Type	basalt	basalt	basalt	picritic basalt	picritic basalt	basalt	basalt	picritic basalt	basalt	basaltic andesite	andesite	andesite	rhyodacite	rhyodacite
Rb ID (mg/g)	2.43	3.67	…	4.68	0.77	3.35	3.3	56.2	35.6	53.8	77.7	92.1	172	157
Sr ID (mg/g)	448.9	222.6	…	382.3	290.2	528.9	405.1	216.9	182.2	194.4	425.4	139.5	151.6	153.9
87Sr/86Sr	0.70371	0.70417	0.704656	0.70549	0.70299	0.70433	0.70462	0.70451	0.70741	0.70979	0.70826	0.71154	0.71961	0.71911
87Sr/86Sri	0.70369	0.70411	0.704423	0.70545	0.70298	0.70431	0.704591	0.703573	0.7067	0.70879	0.707599	0.709151	0.715501	0.715415
Nd ID (mg/g)	13.82	7.21	…	11.19	11.33	17.04	12.04	10.47	17.6	24.5	33.74	27.47	43.92	9.42
Sm ID (mg/g)	4.32	2.37	…	3.23	3.23	4.7	3.15	2.75	4.38	5.49	7.26	6.39	8.85	2.95483
143Nd/144Nd	0.51301	0.51304	0.513017	0.51301	0.513	0.51283	0.51246	0.51256	0.51239	0.51227	0.51205	0.51234	0.51219	0.51218
143Nd/144Ndi	0.512902	0.51293	0.512896	0.51291	0.512901	0.51273	0.512369	0.512469	0.5123	0.51219	0.511975	0.512259	0.51212	0.512104
eNdi	7.35421	7.9	7.34506	7.6	7.34506	4	-3.03243	-1.08825	-4.4	-6.5	-10.718	-5.17764	-7.89397	-8.21165
Pb ID (mg/g)	0.85	…	…	…	…	…	1.83	…	…	…	8.91	14.67	…	21.77
206Pb/204Pb	17.606	…	17.936	…	18.195	…	17.618	17.194	…	…	16.151	18.978	…	19.156
207Pb/204Pb	15.437	…	15.4729	…	15.492	…	15.53	15.4381	…	…	15.274	15.707	…	15.702
208Pb/204Pb	37.594	…	37.8585	…	37.9505	…	37.727	37.3378	…	…	36.668	39.023	…	39.161
Measured isotope ratios are age-corrected (subscript i) to 90 Ma.
Isotope ratios are reported relative to 0.511850 for La Jolla Nd, to 0.71024 for NBS 987 Sr and to the NBS 981 Pb values of Todt et al. (1996).
Reproducibility for NBS 987 Sr over a 3-year period was ± 0.00002 (2s); for La Jolla Nd it was ± 0.000012 (±0.2 eNd units); for NBS 981
Pb it was ± 0.011 for 206Pb/204Pb and 207Pb/204Pb, and ± 0.031 for 208Pb/204Pb. Within-run 2s errors on the tabulated data were ± 0.000008 for
143Nd/144Nd, ± 0.000014 for 87Sr/86Sr, ±0.008 for 206Pb/204Pb, ±0.011 for 207Pb/204Pb, and ±0.032 for 208Pb/204Pb. Total procedural blanks were
negligible at <19 pg for Pb, <74 pg for Sr and <18 pg for Nd. Relative uncertainties for Rb, Sr, Nd, Sm and Pb concentrations measured
by isotope dilution are 1%, 0.5%, 0.2%, 0.2% and 0.5%, respectively. Measurements were made at the University of Hawaii.
The data are from Cucciniello et al. (2010) and Melluso et al. (2001).
